# Supplementary material for: Development and validation of a risk prediction model for end-stage renal disease in patients with type 2 diabetes
Source: PubMed Central journal article supplement (PMC5579050; doi:10.1038/s41598-017-09243-9), 2017-08-31
Supplement: 41598_2017_9243_MOESM1_ESM.pdf [file 41598_2017_9243_MOESM1_ESM.pdf]

## Supplementary information

Development and validation of a risk prediction model for end-stage renal disease in patients with type 2 diabetes

Cheng-Chieh Lin,†<sup>1,2,3</sup> Chia-Ing Li,†<sup>1,3</sup> Chiu-Shong Liu,<sup>1,2,3</sup> Wen-Yuan Lin,<sup>1,2</sup> Chih-Hsueh Lin,<sup>1,2</sup> Sing-Yu Yang,<sup>4</sup> Tsai-Chung Li<sup>4,5\*</sup>

1. School of Medicine, College of Medicine, China Medical University, Taichung, Taiwan
2. Department of Family Medicine, China Medical University Hospital, Taichung, Taiwan
3. Department of Medical Research, China Medical University Hospital, Taichung, Taiwan
4. School of Public Health, College of Public Health, China Medical University, Taichung, Taiwan
5. Department of Healthcare Administration, College of Medical and Health Science, Asia University, Taichung, Taiwan

† Equally contributed as first author

\* Corresponding authors: Tsai-Chung Li, China Medical University, 91 Hsueh-Shih Road, Taichung, 40421, Taiwan, Tel: 886-4-22052121ext. 6605, Fax: 886-4-22060248, e-mail: tcli@mail.cmu.edu.tw

**Supplementary Table 1.** Baseline characteristic of the study population in excluded group and included group

| Variables                                    | Excluded group<br>(n=35,727)<br>MEAN±SD*<br>or n (%) | Included group<br>(n=24,104)<br>MEAN±SD*<br>or n (%) | Standardized<br>effect size |
|----------------------------------------------|------------------------------------------------------|------------------------------------------------------|-----------------------------|
| <i>Socio-demographic factors</i>             |                                                      |                                                      |                             |
| Age (years)                                  | 60.13±11.42                                          | 61.09±10.76                                          | -0.09                       |
| Gender                                       |                                                      |                                                      | -0.02                       |
| Female                                       | 18553 (52.00)                                        | 12815 (53.17)                                        |                             |
| Male                                         | 17128 (48.00)                                        | 11289 (46.83)                                        |                             |
| Smoking habit                                | 5734 (16.05)                                         | 3777 (15.67)                                         | 0.01                        |
| Alcohol drinking                             | 2985 (8.36)                                          | 2186 (9.07)                                          | -0.03                       |
| Age of diabetes onset (years)                | 54.37±11.15                                          | 54.44±10.83                                          | -0.01                       |
| Duration of type 2 diabetes (years)          | 6.42±6.75                                            | 6.68±6.35                                            | -0.04                       |
| Body mass index (kg/m <sup>2</sup> )         | 25.56±4.00                                           | 25.71±3.75                                           | -0.04                       |
| Obesity                                      | 12224 (34.22)                                        | 8854 (36.73)                                         | -0.05                       |
| <i>Diabetes-related factor and biomarker</i> |                                                      |                                                      |                             |
| Systolic blood pressure (mm Hg)              | 134.58±18.43                                         | 134.86±17.72                                         | -0.02                       |
| Diastolic blood pressure (mm Hg)             | 80.17±11.09                                          | 80.04±10.5                                           | 0.01                        |
| HbA1c level (%)                              | 8.39±2.07                                            | 8.2±1.93                                             | 0.09                        |
| Fasting blood glucose (mg/dL)                | 179.15±71.6                                          | 171.67±64.83                                         | 0.11                        |
| Low-density lipoprotein (mg/dL)              | 118.08±31.43                                         | 117.86±31.27                                         | 0.01                        |
| High-density lipoprotein (mg/dL)             | 46.26±14.25                                          | 46.28±13.99                                          | 0.00                        |
| Creatinine (mg/dL)                           | 1.06±0.63                                            | 1.05±0.53                                            | 0.02                        |
| Serum glutamate-pyruvate transaminase (u/l)  | 32.69±34.97                                          | 32.19±32.73                                          | 0.01                        |
| Total cholesterol (mg/dL)                    | 198.85±47.60                                         | 195.72±42.04                                         | 0.07                        |
| Triglyceride (mg/dL)                         | 181.43±146.12                                        | 171.92±130.92                                        | 0.07                        |
| eGFR (mg/dL)                                 | 75.86±23.12                                          | 73.38±21.78                                          | 0.11                        |
| Variation in fasting blood glucose (%)       | 34.28±28.60                                          | 32.01±25.67                                          | 0.09                        |
| Variation in HBA1c (%)                       | 18.14±16.88                                          | 16.47±14.64                                          | 0.11                        |
| Variation in systolic blood pressure (%)     | 7.70±6.06                                            | 7.39±5.55                                            | 0.06                        |
| Variation in diastolic blood pressure (%)    | 7.92±6.61                                            | 7.71±6.1                                             | 0.03                        |
| <i>Comorbidity</i>                           |                                                      |                                                      |                             |
| Hypertension                                 | 15023 (42.05)                                        | 11031 (45.76)                                        | -0.07                       |
| Stroke                                       | 2060 (5.77)                                          | 1176 (4.88)                                          | 0.04                        |
| Cardiovascular disease                       | 3022 (8.46)                                          | 2150 (8.92)                                          | -0.02                       |
| Peripheral Neuropathy                        | 164 (0.46)                                           | 220 (0.91)                                           | -0.06                       |

|                                               |              |              |       |
|-----------------------------------------------|--------------|--------------|-------|
| Diabetes retinopathy                          | 543 (1.52)   | 324 (1.34)   | 0.02  |
| Disease of peripheral circulatory disturbance | 1441 (4.03)  | 955 (3.96)   | 0.00  |
| Hypoglycemia                                  | 1383 (3.87)  | 1016 (4.22)  | -0.02 |
| Chronic kidney disease                        | 375 (1.05)   | 232 (0.96)   | 0.01  |
| Ketoacidosis                                  | 355 (0.99)   | 196 (0.81)   | 0.02  |
| Postural hypotension                          | 25 (0.07)    | 21 (0.09)    | -0.01 |
| Arterial embolism and thrombosis              | 69 (0.19)    | 38 (0.16)    | 0.01  |
| Peripheral vascular disease                   | 214 (0.6)    | 208 (0.86)   | -0.03 |
| Hyperlipidemia                                | 8207 (22.97) | 6394 (26.53) | -0.08 |
| <i>Outcome</i>                                |              |              |       |
| ESRD                                          | 2126 (5.95)  | 1215 (5.04)  | 0.04  |

---

\*: SD = standard deviation

**Supplementary Table 2.** ESRD risk score based on the final multivariate Cox's proportional hazards model with multiple imputation dataset (n=52,528) and complete dataset (n=24,104)

| Risk factor                                          | $\beta$ (SE)<br>Dataset with multiple<br>imputation | $\beta$ (SE)<br>Complete dataset |
|------------------------------------------------------|-----------------------------------------------------|----------------------------------|
| <i>Socio-demographic factors</i>                     |                                                     |                                  |
| Age                                                  | 0.01 (0.002)                                        | 0.02 (0.004)                     |
| Gender (male)                                        | 0.03 (0.04)                                         | -0.01 (0.07)                     |
| Age of diabetes onset (years) (ref: <45)             |                                                     |                                  |
| $\geq 45$                                            | -0.62 (0.05)                                        | -0.56 (0.10)                     |
| <i>Diabetes-related factor and biomarker</i>         |                                                     |                                  |
| Creatinine (mg/dL) (ref: <2.0)                       |                                                     |                                  |
| 2.0–4.0                                              | 2.59 (0.05)                                         | 2.57 (0.10)                      |
| >4.0                                                 | 3.10 (0.10)                                         | 2.65 (0.22)                      |
| Variation in HbA1c (%) (ref: <8.5)                   |                                                     |                                  |
| 8.5–17.5                                             | 0.06 (0.05)                                         | 0.23 (0.09)                      |
| >17.5                                                | 0.26 (0.05)                                         | 0.48 (0.09)                      |
| Variation in systolic blood pressure (%) (ref: <4.4) |                                                     |                                  |
| 4.4–8.7                                              | -0.06 (0.05)                                        | -0.08 (0.09)                     |
| >8.7                                                 | 0.04 (0.05)                                         | 0.24 (0.09)                      |
| <i>Diabetes-related disorders</i>                    |                                                     |                                  |
| Diabetes retinopathy                                 | 1.18 (0.08)                                         | 0.88 (0.17)                      |
| Albuminuria                                          | 0.40 (0.06)                                         | 0.50 (0.09)                      |
| <i>Medication use</i>                                |                                                     |                                  |
| Anti-diabetes medications<br>(ref: no medication)    | ref                                                 | ref                              |
| Oral only                                            | -0.57 (0.07)                                        | -0.60 (0.21)                     |
| Insulin                                              | 0.33 (0.09)                                         | 0.45 (0.23)                      |
| Insulin+oral agent                                   | 0.15 (0.09)                                         | 0.12 (0.23)                      |
| Hypertension medications                             |                                                     |                                  |
| No                                                   |                                                     |                                  |
| SBP<130 and DBP<85                                   | ref                                                 | ref                              |
| SBP:130-139 or DBP:85-89                             | 0.02 (0.10)                                         | 0.12 (0.21)                      |
| SBP:140-159 or DBP:90-99                             | 0.37 (0.09)                                         | 0.46 (0.20)                      |
| SBP $\geq$ 160 or DBP $\geq$ 100                     | 0.89 (0.10)                                         | 0.72 (0.25)                      |
| Yes                                                  |                                                     |                                  |
| SBP<130 and DBP<85                                   | 0.73 (0.09)                                         | 0.99 (0.17)                      |
| SBP:130-139 or DBP:85-89                             | 0.79 (0.08)                                         | 1.06 (0.17)                      |
| SBP:140-159 or DBP:90-99                             | 1.13 (0.08)                                         | 1.33 (0.16)                      |
| SBP $\geq$ 160 or DBP $\geq$ 100                     | 1.46 (0.08)                                         | 1.65 (0.17)                      |
| Hyperlipidemia medications                           |                                                     |                                  |
| No                                                   |                                                     |                                  |
| Total cholesterol: <200                              | ref                                                 | ref                              |
| Total cholesterol: 200-239                           | 0.21 (0.06)                                         | 0.34 (0.12)                      |

|                               |             |             |
|-------------------------------|-------------|-------------|
| Total cholesterol: $\geq 240$ | 0.71 (0.07) | 0.53 (0.17) |
| Yes                           |             |             |
| Total cholesterol: $< 200$    | 0.29 (0.06) | 0.36 (0.11) |
| Total cholesterol: 200-239    | 0.31 (0.06) | 0.35 (0.11) |
| Total cholesterol: $\geq 240$ | 0.89 (0.06) | 0.91 (0.11) |

---

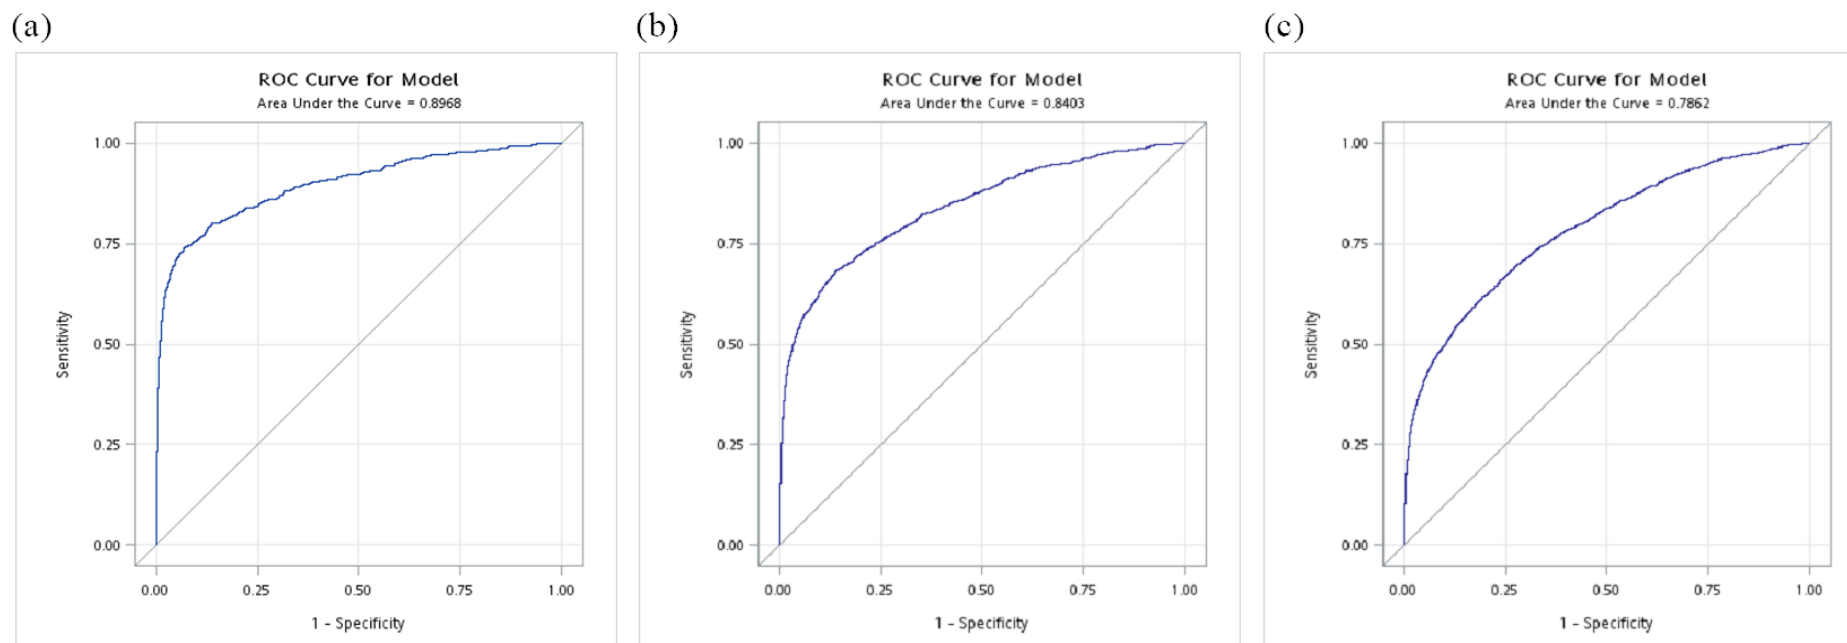

**Supplementary Figure 1.** Receiver-operating characteristiccurve (ROC) for (a) 3-year (b) 5-year (c) 8-year ESRD riskin sensitivity analysis (N=52,528)

(a)

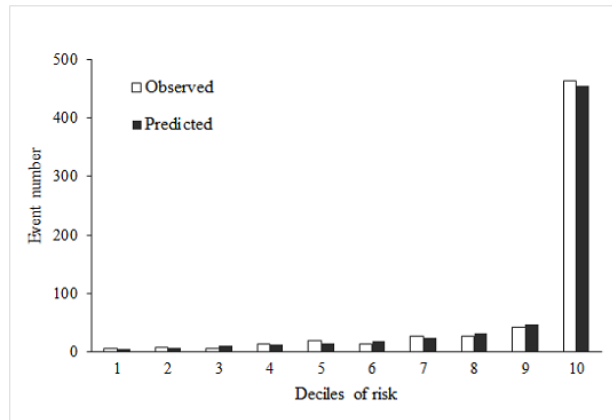

(b)

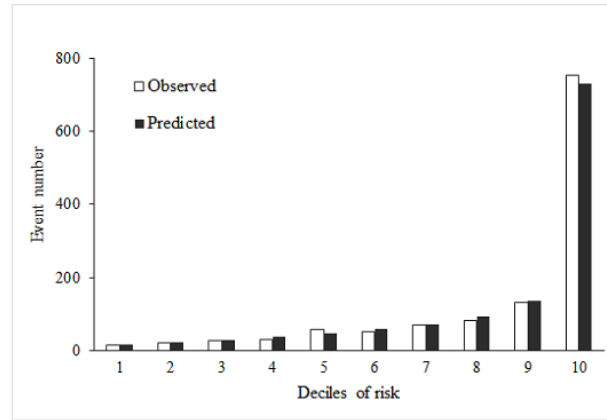

(c)

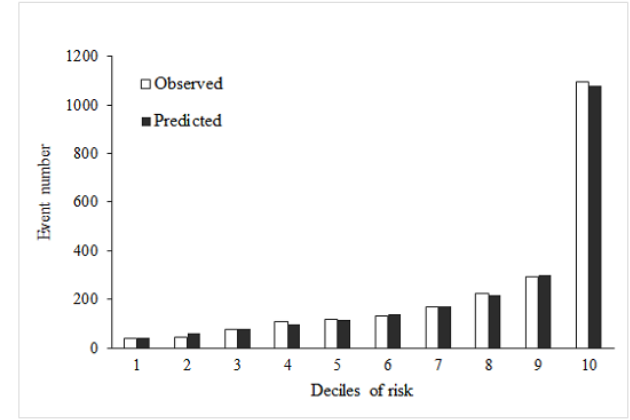

**Supplementary Figure 2.** Predicted versus observed ESRD numbers according to deciles of (a) 3-year (b) 5-year and (c) 8-year risk in sensitivity analysis (N=52,528)

(a)

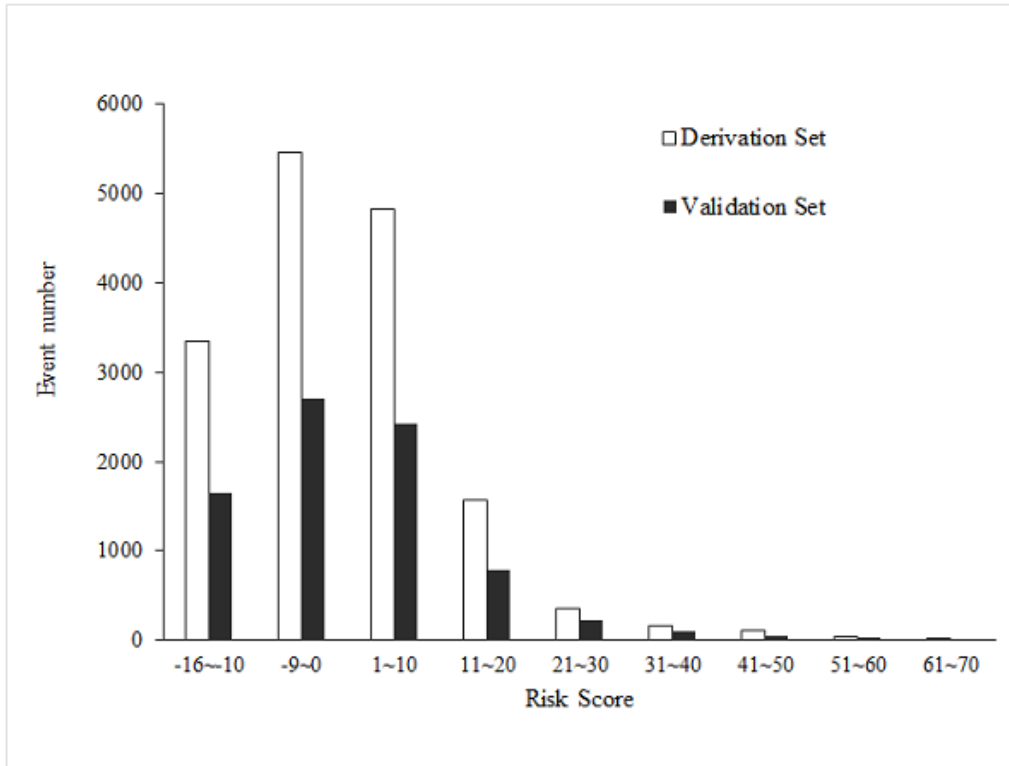

(b)

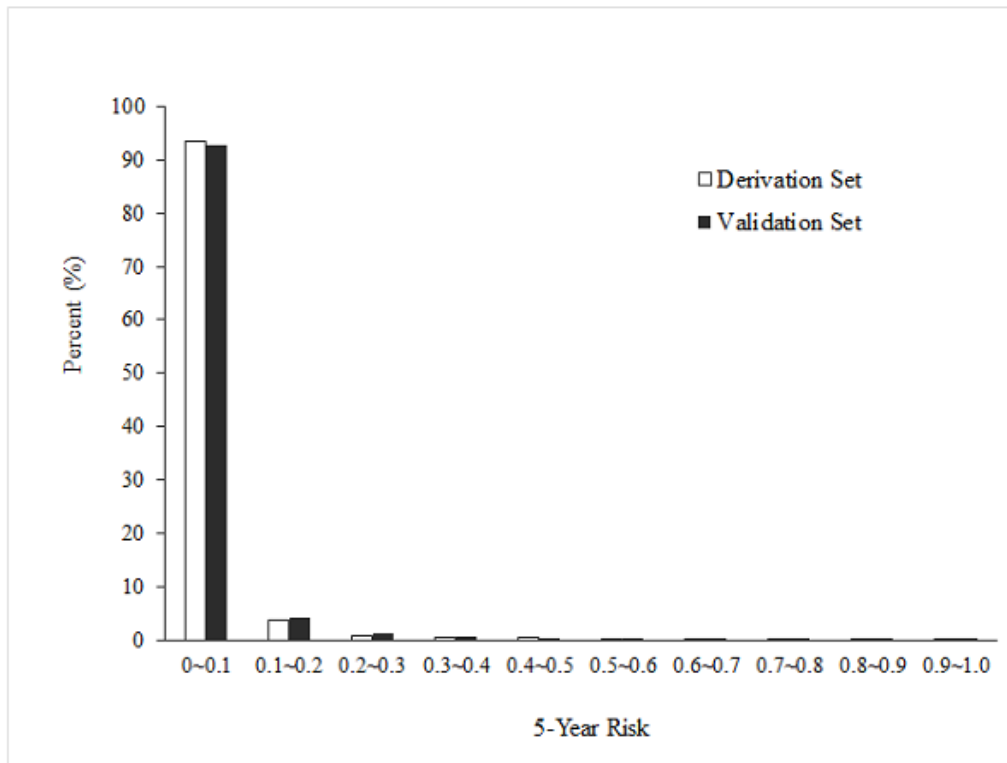

**Supplementary Figure 3.** The distributions of risk score (a) and 5-year risk (b) for derivation and validation sets
